# Supplementary material
Source: Royal Society of Chemistry journal article supplement (doi:10.1039/d6cc02580c)
Supplement: d6cc02580c1.pdf [file d6cc02580c1.pdf]

Supplementary Information (SI)

Enhanced nitrate electroreduction to ammonia on RuRhFeCoNiCu high-entropy oxide nanotubes by constructing oxygen vacancies

Xin Jiang,<sup>#a</sup> Zhixin Wang,<sup>#a</sup> Panyan Chen,<sup>a</sup> Heng Bian,<sup>a</sup> luokai wang,<sup>b</sup> Honghui Wang,<sup>\*c</sup> Xinsheng Zhao,<sup>\*a</sup> and Lu Wei,<sup>\*a</sup>

<sup>a</sup> School of Physics and Electronic Engineering, Jiangsu Normal University, Xuzhou 221116, China

<sup>b</sup> CW CHU COLLEGE, Jiangsu Normal University, Xuzhou 221116, China.

<sup>c</sup> Xiamen University Tan Kah Kee College, Zhangzhou 363105, China.

\* Corresponding authors

E-mail addresses: lwei057@jsnu.edu.cn (L. Wei), xinshengzhao@jsnu.edu.cn (X. Zhao)

whhui2006@163.com (H. Wang)

# X. Jiang and Z. Wang contributed equally to this work.

## Experimental Section

### Chemical and materials.

Rutheniumchloride hydrate ( $\text{RuCl}_3 \cdot x\text{H}_2\text{O}$ ), potassium hexachlororhodate ( $\text{K}_3\text{RhCl}_6$ ), ferric trichloride ( $\text{FeCl}_3$ ), cobalt(II) nitrate hexahydrate ( $\text{Co}(\text{NO}_3)_3 \cdot 6\text{H}_2\text{O}$ ), nickel chloride hexahydrate ( $\text{NiCl}_2 \cdot 6\text{H}_2\text{O}$ ), copper nitrate trihydrate ( $\text{Cu}(\text{NO}_3)_3 \cdot 3\text{H}_2\text{O}$ ), N,N-dimethylformamide (DMF), polyvinylpyrrolidone (PVP,  $M_w=1300000$ ), potassium sulfate ( $\text{K}_2\text{SO}_4$ ), potassium nitrate ( $\text{KNO}_3$ ), hydrogen peroxide solution ( $\text{H}_2\text{O}_2$ , 30%), sulfuric acid ( $\text{H}_2\text{SO}_4$ , 98%) and absolute ethanol were purchased from Sinopharm Chemical Reagent Co. Ltd (China). High purity argon (Ar, 99.999%) gases were purchased from Xuzhou specialty gas Co. Ltd. Nafion solution (5 wt%) was purchased from Sigma-Aldrich Chemical Reagent Co., Ltd. All reagents are analytical grade and used without further purifications.

### Synthesis of RuRhFeCoNiCu HEO-NTs with oxygen vacancies.

The RuRhFeCoNiCu HEO-NTs were prepared as follow: Typically, 0.5 g of  $\text{RuCl}_3 \cdot x\text{H}_2\text{O}$ , 0.27 g of  $\text{K}_3\text{RhCl}_6$ , 0.081 g of  $\text{FeCl}_3$ , 0.15 g of  $\text{Co}(\text{NO}_3)_3 \cdot 6\text{H}_2\text{O}$ , 0.12 g of  $\text{NiCl}_2 \cdot 6\text{H}_2\text{O}$ , and 0.12 g of  $\text{Cu}(\text{NO}_3)_3 \cdot 3\text{H}_2\text{O}$  were first dissolved in a 5 mL of DMF and magnetically stirred for 24 h at 40 °C. Then, 0.614 g of PVP was added to the resulting solution and stirred for 24 h at room temperature to form a viscous precursor solution. Subsequently, the prepared solution was put in a 10 ml plastic syringe equipped with a stainless-steel nozzle with an inner diameter of 0.6 mm. A high-voltage power supply of 15 kV was applied between the needle tip and the rotating drum collector at a distance of 15 cm. The syringe pump device was used to maintain the solution at a propulsion rate of  $0.015 \text{ mm min}^{-1}$ . After the electrospinning process, the resulting fibers were collected and HEO-treated at 70 °C for 2 h in a vacuum drying oven. Soon afterwards, the treated fibers were transferred

to muffle furnace, in which the fibers were calcined at 400 °C for 3 h under air atmosphere. After calcination, the resulting fibers keep in a quartz tube furnace with N<sub>2</sub>/H<sub>2</sub> (10%) mixture carrier gas at 150 °C for 0.5 h, and then naturally cooled down to room temperature.

**Characterization.** The field emission scanning electron microscopy (SEM) images of RuRhFeCoNiCu HEO-NTs were performed on SU8010 electron microscope. Transmission electron microscopy (TEM), selected-area electron diffraction (SAED) patterns and elemental mapping measurements were carried out on FEI Tecnai-F20 transmission electron microscope at 200 kV. The Ru, Rh, Fe, Co, Ni and Cu contents of HEO-NTs were analyzed by energy-dispersive X-ray (EDX) on FEI Tecnai-F20 TEM and inductively coupled plasma-mass spectrometry (ICP-MS, Thermo ICAP-QC). X-ray diffraction (XRD) patterns were collected using an X-ray diffractometer (Rigaku D/MAX 2500 v/pc, Japan) with a Cu Ka radiation source ( $\lambda = 1.5406 \text{ \AA}$ ). X-ray photoelectron spectroscopy (XPS) was carried out on an ESCALAB 250Xi spectrometer (Thermo Scientific, USA). The measured value of the electron binding energy was calibrated with respect to the principal peak of C 1s at 284.5 eV as the internal standard.

#### **Preparation of RuRhFeCoNiCu HEO-NTs electrode**

5.0 mg of the RuRhFeCoNiCu HEO-NTs and 50  $\mu\text{L}$  Nafion solution (5 wt %) were mixed with 600  $\mu\text{L}$  absolute ethanol and dispersed by ultrasonic treatment for 2 h. Then take 20  $\mu\text{L}$  of the HEO-NTs ink drip onto a GC electrode with a diameter of 6 mm and naturally dried in air. The catalyst loading of the as-synthesized RuRhFeCoNiCu HEO-NTs electrode is 0.15 mg.

#### **Preparation of commercial Ru, Rh, Cu catalysts electrodes**

The preparation of commercial Ru, Rh, Cu catalysts electrodes are similar to that of HEO-NTs electrode. Namely, 5.0 mg of commercial catalysts and 50  $\mu\text{L}$  Nafion solution (5 wt %) were mixed

with 600  $\mu\text{L}$  absolute ethanol and dispersed by ultrasonic treatment for 2 h. Then take 20  $\mu\text{L}$  of the catalyst ink drip onto a GC electrode with a diameter of 6 mm and naturally dried in air.

### **Electrochemical measurements**

The NRA tests were conducted in an H-type electrolytic cell containing 1 M KOH + 1 M KNO<sub>3</sub> solution. The saturated calomel reference electrode (SCE) and graphite carbon rod counter electrode were used. The cathodic and anodic chambers of the reactor were separated by Nafion117 that was boiled successively in 5 % H<sub>2</sub>O<sub>2</sub>, 0.5 M H<sub>2</sub>SO<sub>4</sub>, and ultrapure water at 80 °C for 1 h. High-purity Ar was passed for 2 hours before the test to completely remove O<sub>2</sub> from the electrolyte solution, and passed throughout the NRA reaction. The scan rates for LSV tests were maintained at 20 mV s<sup>-1</sup>. Chronoamperometry (CA) was performed at various applied potentials (-1.1, -1.2, -1.3, -1.4, -1.5, -1.6 V vs SCE) for 1 h. All the current densities were calculated on the basis of the geometric surface area of working electrode. The gaseousness NH<sub>3</sub> product was collected by 10 mM HCl solution during the electrolysis. The NH<sub>4</sub><sup>+</sup>, NO<sub>2</sub><sup>-</sup> and N<sub>2</sub>H<sub>4</sub> products were detected by UV-Vis spectrophotometer.

### **Products measurements**

NH<sub>4</sub><sup>+</sup> was detected by indophenol blue indicator method: Take 1 mL solution from the cathode chamber, then add 1 mL of 10 mM HCl solution for acidification, 2 mL solution containing 1 M sodium hydroxide, 5 wt% sodium citrate and 5 wt% salicylic acid, 1 mL NaClO solution and 0.2 mL nitrofurantoin solution, respectively. The absorbance at 656 nm was measured after 1 hour at room temperature.

The yield rate ( $R_{(\text{NH}_3)}$ ) and Faraday efficiency (FE) of product NH<sub>3</sub> were calculated as follows:

$$R(NH_3) = \frac{[NH_4^+] \times V}{t \times m_{cat}}$$

$$FE_{NH_3} = \frac{Q_{NH_4^+}}{Q_{total}} = \frac{8 \times 96500 \times [NH_4^+] \times V}{M_{NH_4^+} \times \int idt}$$

$[NH_4^+]$  is the concentration of  $NH_4^+$  in the cathode chamber solution after electrolysis for 1 hours,  $V$  is the volume of electrolyte solution in the cathode chamber,  $t$  is the electrolytic time of 1 hours,  $Q_{NH_4^+}$  is the electricity consumed by the generation of  $NH_4^+$  for 1 hours of electrolysis, and  $Q_{total}$  is the electricity consumed in 1 hours of electrolysis.

Determination of  $NH_4^+$  concentration standard curves: Detect the absorbance at 656 nm of 1 M KOH + 1 M  $KNO_3$  solution standard solutions with different  $NH_4^+$  concentrations. The absorbance -  $NH_4^+$  concentration relation curve was obtained by linear fitting each concentration with the corresponding absorbance, as shown in Figure S10.

Preparation of  $NO_2^-$  indicator: 4 g p-aminobenzene sulfonamide and 0.2 g N-ethylenediamine hydrochloride were dissolved in 50 ml water and 10 ml phosphoric acid to make a lavender translucent solution.

Detection of  $NO_2^-$ : Mix 5 mL solution from the cathode chamber with 0.1 mL indicator. The absorbance at 540 nm was measured after 1 hour at room temperature.

The Faraday efficiency of  $NO_2^-$  was calculated as follows:

$$FE_{NO_2^-} = \frac{Q_{NO_2^-}}{Q_{total}} = \frac{2 \times 96500 \times [NO_2^-] \times V}{\int idt}$$

$[NO_2^-]$  is the concentration of  $NO_2^-$  in the cathode chamber solution after electrolysis for 1 hours,  $V$  is the volume of electrolyte solution in the cathode chamber,  $t$  is the electrolytic time of 1 hours,  $Q_{NO_2^-}$  is the electricity consumed by the generation of  $NO_2^-$  for 1 hours of electrolysis, and  $Q_{total}$  is the electricity consumed in 1 hours of electrolysis.

Determination of  $\text{NO}_2^-$  concentration standard curves: Detect the absorbance at 540 nm of 1 M KOH + 1 M  $\text{KNO}_3$  solution standard solutions with different  $\text{NO}_2^-$  concentrations. The absorbance -  $\text{NO}_2^-$  concentration relation curve was obtained by linear fitting each concentration with the corresponding absorbance, as shown in Figure S12.

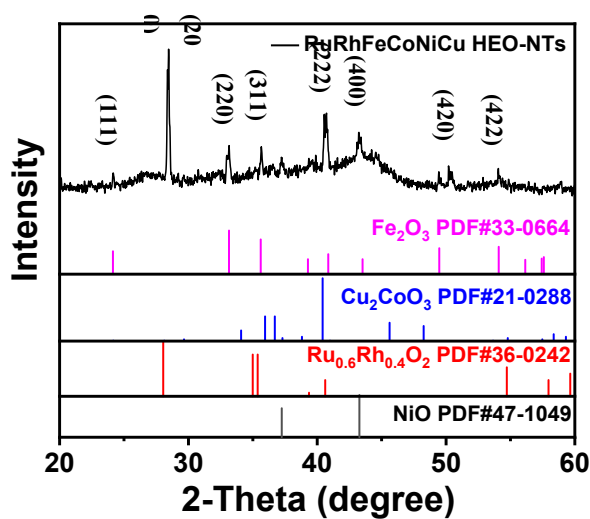

Fig. S1. XRD curves of RuRhFeCoNiCu HEO-NTs.

Fig. S1 shows XRD curves of RuRhFeCoNiCu HEO-NTs and the standard reference patterns. Based on the comparison with reference patterns, we conclude that no diffraction peaks from pure oxide phases are present within the detection limit of XRD. This supports the conclusion that all the HEO elements are homogeneously incorporated into the high-entropy lattice. The small peak shifts observed relative to the reference patterns are attributed to lattice distortion induced by the multiple elements.

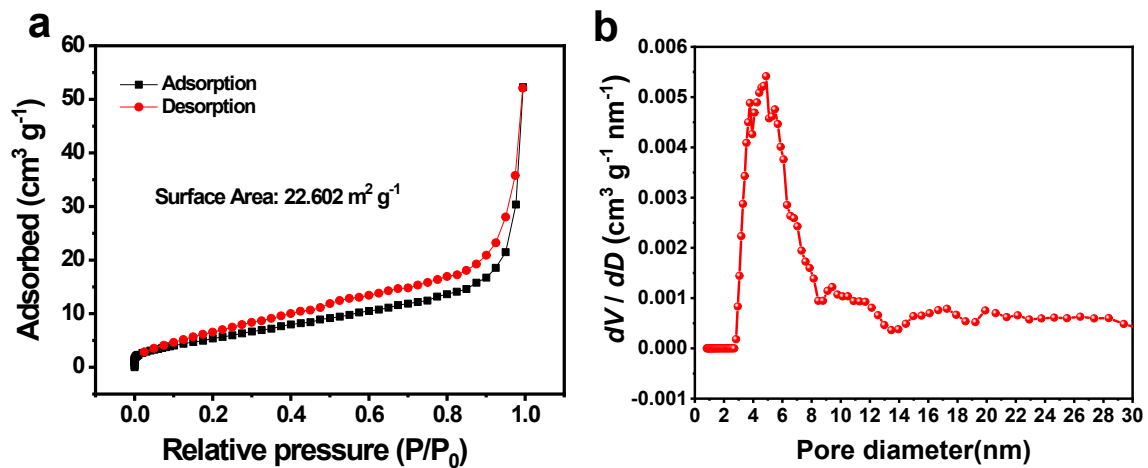

Fig. S2. (a)  $N_2$  adsorption-desorption isotherm and (b) the pore size distribution of RuRhFeCoNiCu HEO-NTs.

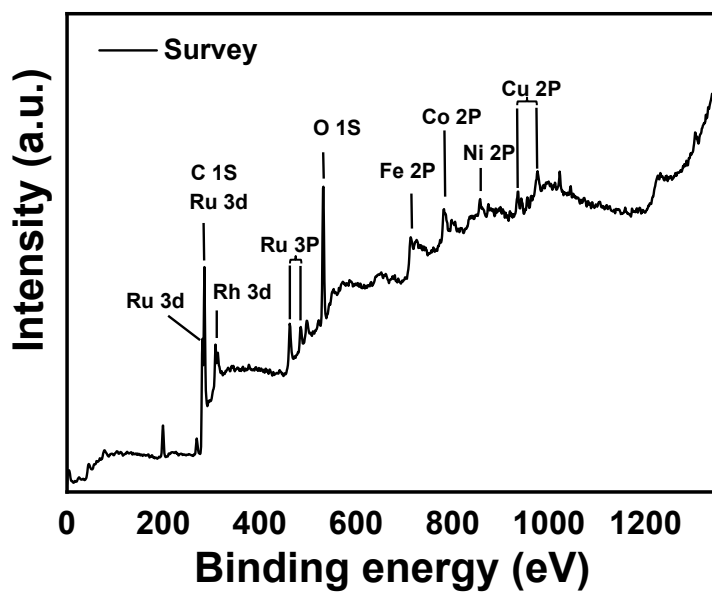

Figure S3. XPS survey spectrum of RuRhFeCoNiCu HEO-NTs.

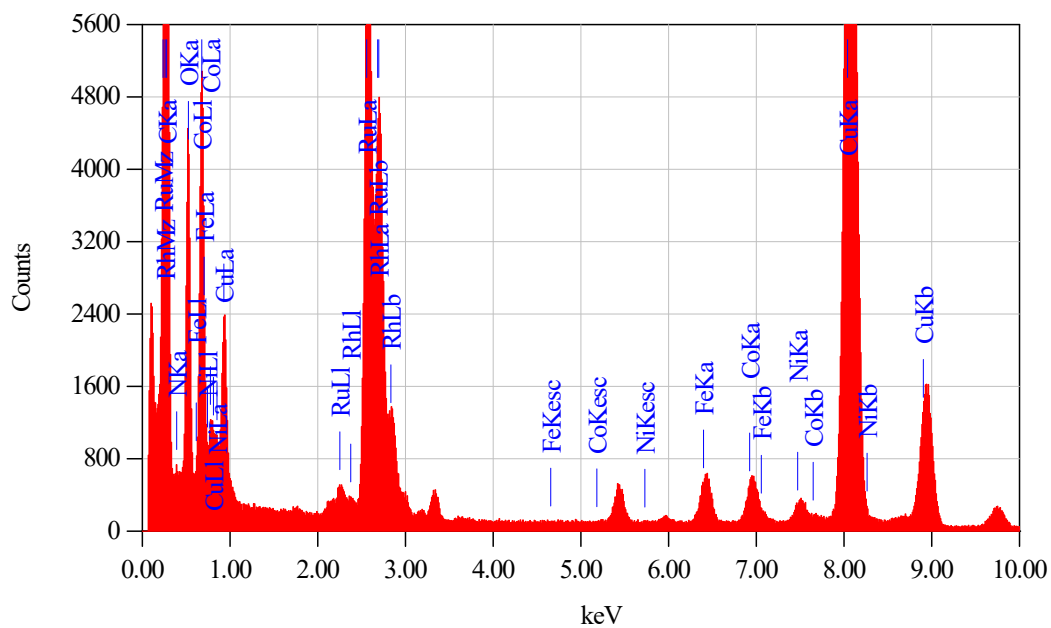

Fig. S4. EDS spectrum of RuRhFeCoNiCu HEO-NTs.

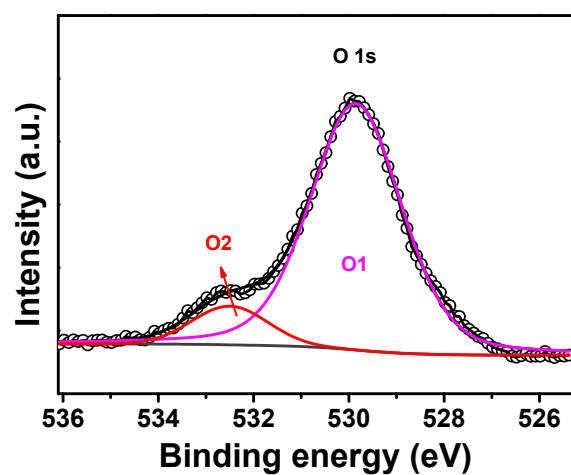

Fig. S5. High resolution O 1s XPS of RuRhFeCoNiCu HEO-NTs without H<sub>2</sub> treatment.

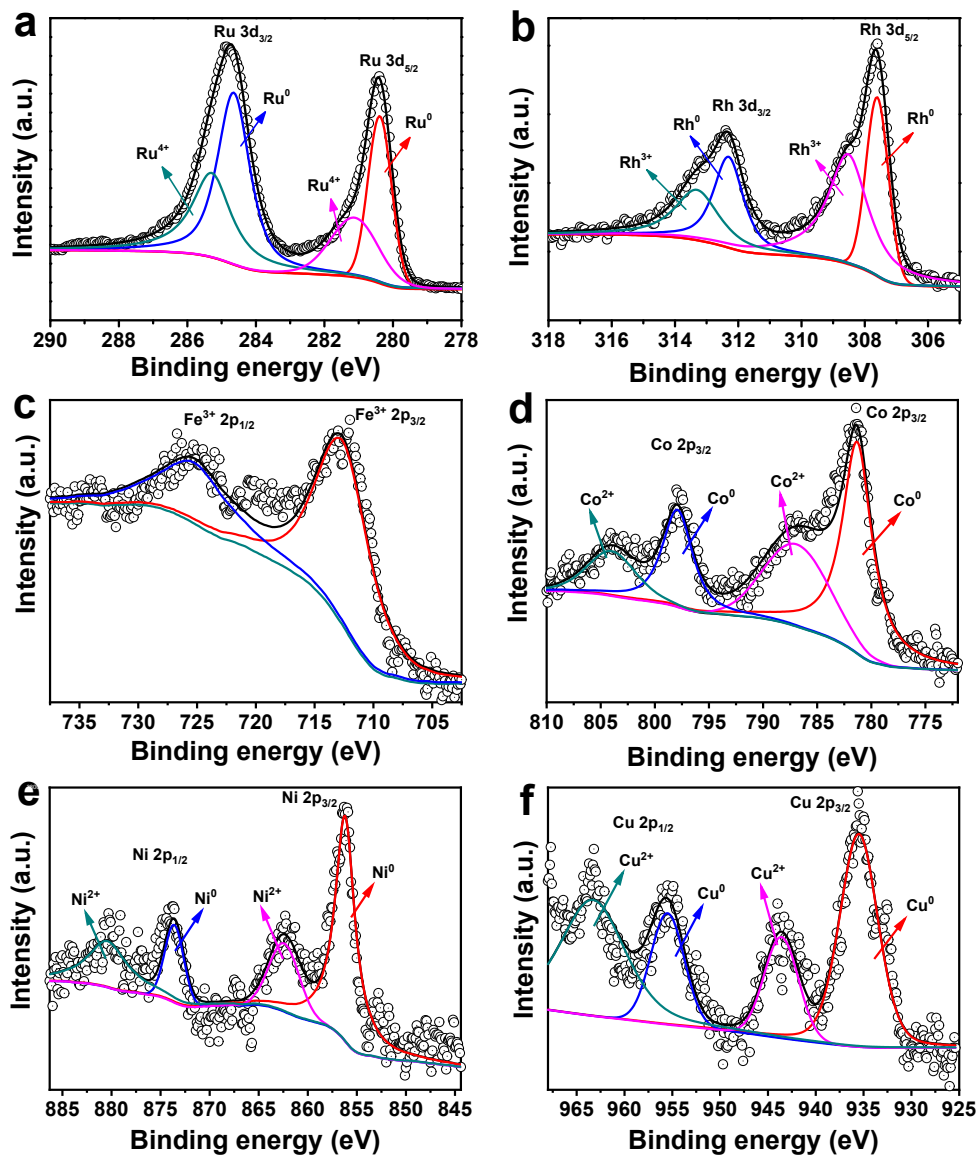

Fig. S6. High resolution XPS spectra of RuRhFeCoNiCu HEO-NTs: (a) Ru 3d, (b) Rh 3d, (c) Fe 2p, (d) Co 2p, (e) Ni 2p, (f) Cu 2p.

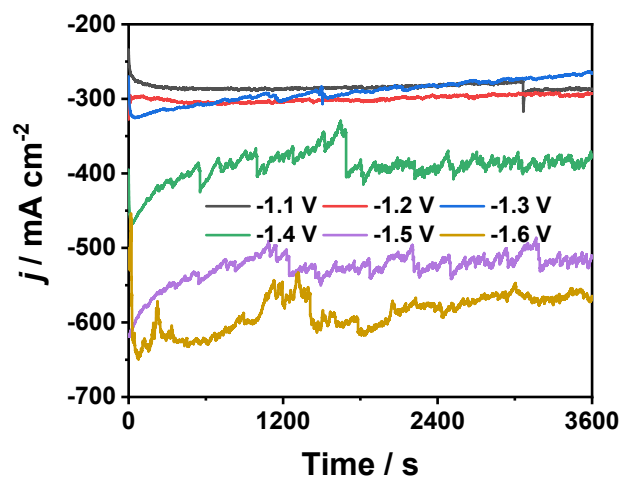

Fig. S7. *i-t* curves at various applied potentials.

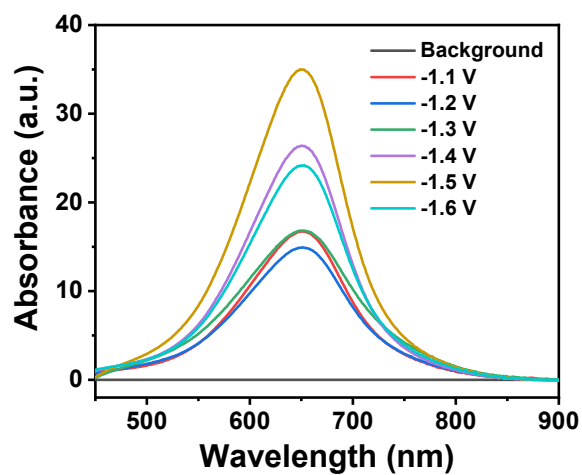

Fig. S8. UV-vis absorption spectra of electrolytic solutions at various applied potentials measured by indophenol blue indicator method.

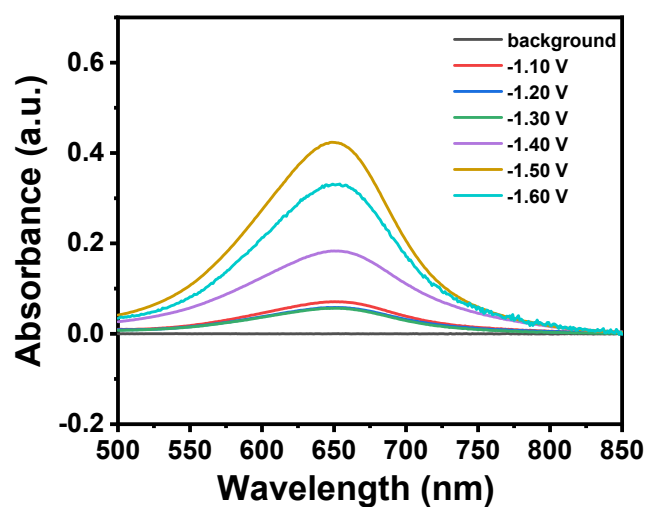

Fig. S9. UV-vis absorption spectra of the collecting tail gas solutions at various applied potentials measured by indophenol blue indicator method.

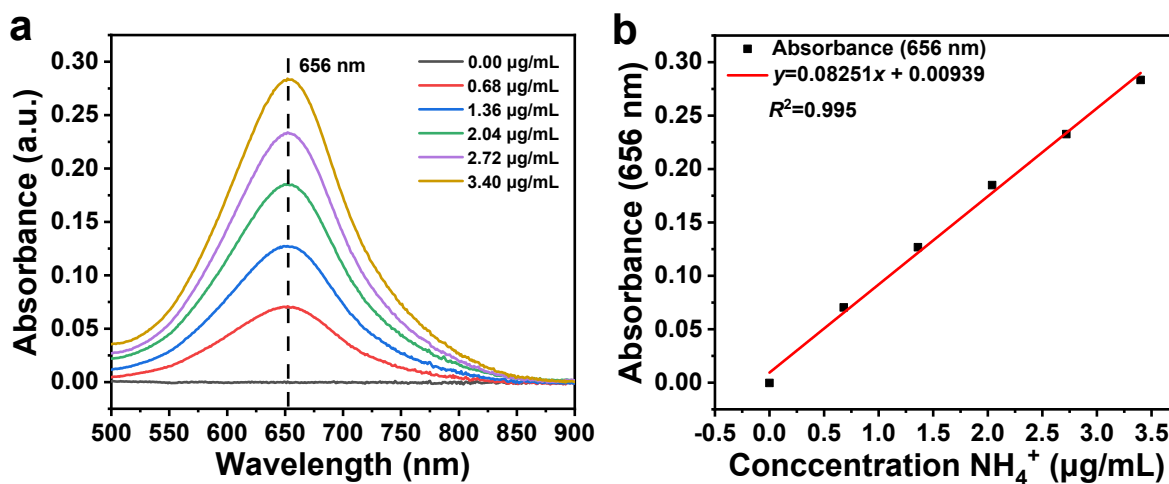

Fig. S10. (a) UV-vis absorption spectra of standard solutions with different concentrations of  $\text{NH}_4^+$ . (b) Linear relationship between absorbance and concentration of  $\text{NH}_4^+$ :  $y = 0.08251x + 0.00939$ ,  $R^2 = 0.995$ .

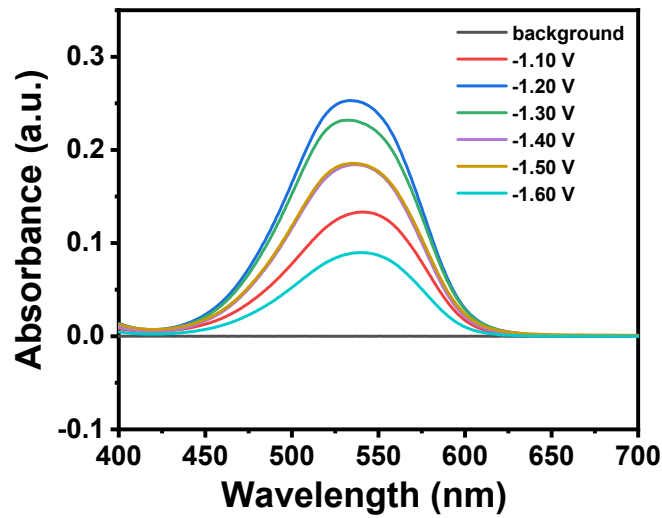

Fig. S11. UV-vis absorption spectra of  $\text{NO}_2^-$  in electrolytic solutions at various applied potentials.

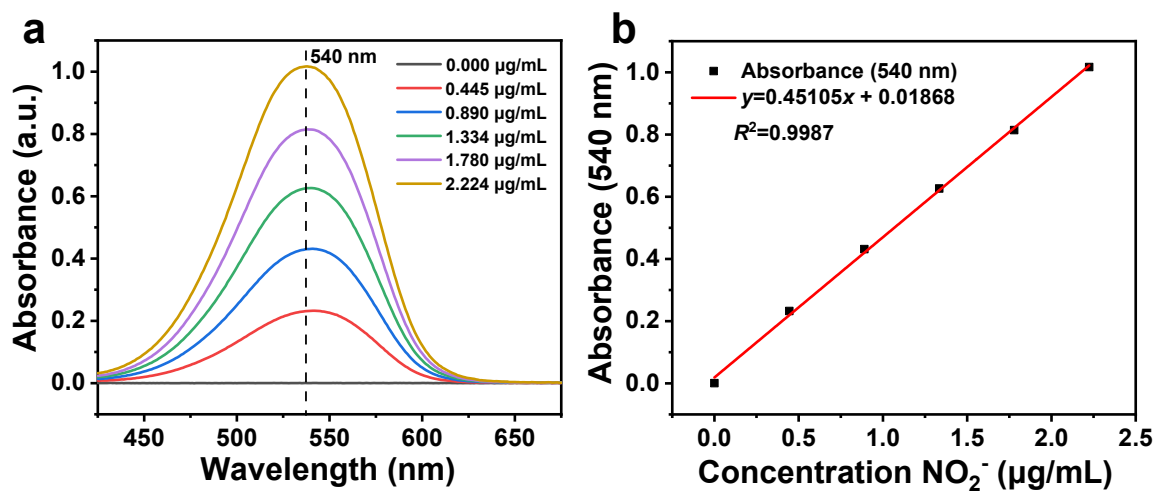

Fig. S12. (a) UV-vis absorption spectra of standard solutions with different concentrations of  $\text{NO}_2^-$ .  
 (b) Linear relationship between absorbance and concentration of  $\text{NO}_2^-$ :  $y = 0.45105x + 0.01868$ ,  $R^2 = 0.9987$ .

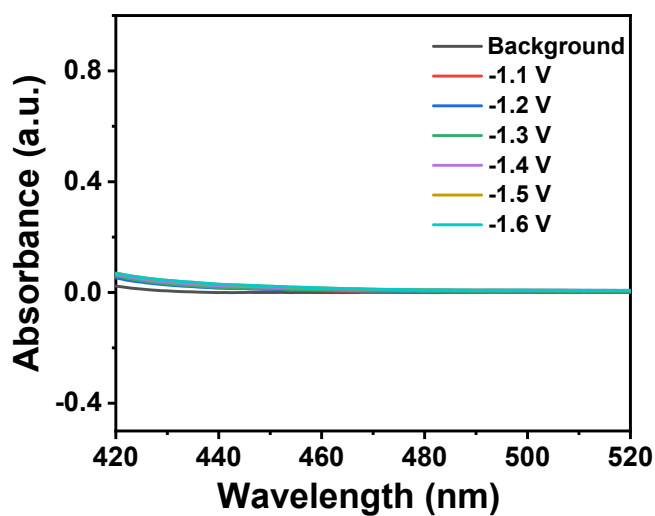

Fig. S13. UV-vis absorption spectra of  $N_2H_4$  in electrolytic solutions at various applied potentials measured by Watt and Chrisp method.

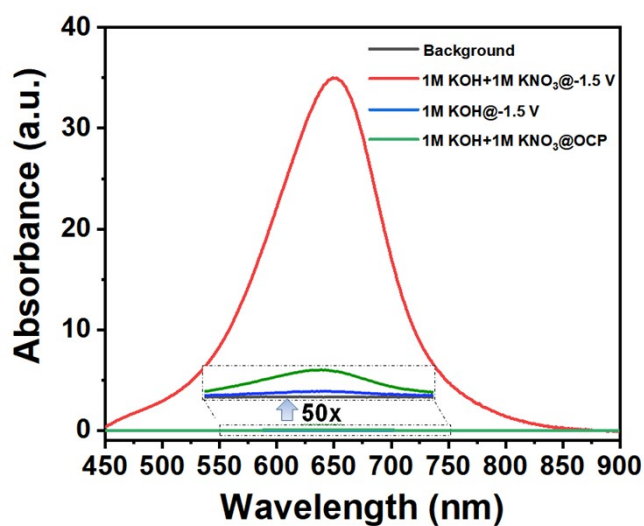

Fig. S14. UV-vis absorption spectra of the electrolytes stained with the indophenol indicator under different conditions. Inset is the absorption intensity with 50 times magnification of the area in the dashed box.

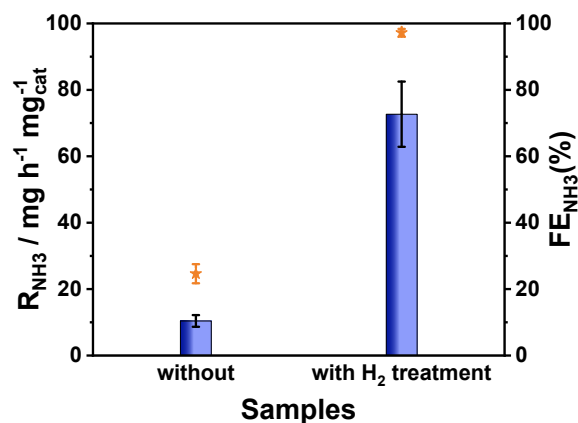

Fig. S15. Comparison of  $R_{\text{NH}_3}$  and  $\text{FE}_{\text{NH}_3}$  at -1.5 V (vs. SCE) on RuRhFeCoNiCu HEO-NTs without and with  $\text{H}_2$  treatment.

Fig. S15 compares the NRA performance ( $R_{\text{NH}_3}$  and  $\text{FE}_{\text{NH}_3}$ ) of the RuRhFeCoNiCu HEO-NTs without and with  $\text{H}_2$  treatment. The untreated sample exhibits substantially lower  $\text{NH}_3$  yield ( $R_{\text{NH}_3}$ ) and Faradaic efficiency ( $\text{FE}_{\text{NH}_3}$ ) compared to the  $\text{H}_2$ -treated sample. For example, at -1.5 V vs. SCE, the untreated sample gives an  $R_{\text{NH}_3}$  of only  $10.4 \text{ mg h}^{-1} \text{ mg}_{\text{cat}}^{-1}$  and a  $\text{FE}_{\text{NH}_3}$  of 24.6%, whereas the  $\text{H}_2$ -treated sample reaches  $72.7 \text{ mg h}^{-1} \text{ mg}_{\text{cat}}^{-1}$  and 97.2% under the same conditions. These control experiments clearly show that the introduction of OV s via  $\text{H}_2$  treatment greatly enhances the NRA activity.

Table S1. Comparison of the NH<sub>3</sub> yield rate and FE on the advanced high-entropy catalysts for NRA.

| Entry | Catalysts                                | Electrolytes                                                                | NH <sub>3</sub> yield                   | FE / % | Refs.                                       |
|-------|------------------------------------------|-----------------------------------------------------------------------------|-----------------------------------------|--------|---------------------------------------------|
| 1     | RuFeCoNiMnMo                             | 0.5 M K <sub>2</sub> SO <sub>4</sub> + 0.1 M KNO <sub>3</sub>               | 83.35 <sup>a</sup>                      | 99.3   | Adv. Mater. 2026, 38, e21096                |
| 2     | RuPdCoCuZn                               | 0.1 M KOH + 0.1 M KNO <sub>3</sub>                                          | 20.95 <sup>b</sup>                      | >90    | Angew. Chem. Int. Ed. 2026, 65, e20035      |
| 3     | (CoMnFeNiCu) <sub>3</sub> O <sub>4</sub> | 1.0 M KOH + 0.1 M KNO <sub>3</sub>                                          | 1.83 <sup>b</sup>                       | 96.3   | Adv. Mater. 2025, 37, e08982                |
| 4     | MnFeCoNiCu                               | 0.5 M Na <sub>2</sub> SO <sub>4</sub> + 0.1 M NO <sub>3</sub> <sup>-</sup>  | 10.2 <sup>a</sup>                       | 94.5   | Adv. Mater. 2025, 37, 2415739               |
| 5     | HEA-RE                                   | 0.5 M K <sub>2</sub> SO <sub>4</sub> + 200 ppm M KNO <sub>3</sub>           | 0.215 <sup>d</sup>                      | ~99    | Angew. Chem. Int. Ed. 2025, 64, e202515842  |
| 6     | CoNiCuMnFe                               | 0.1 M KOH + 0.05 M NO <sub>3</sub> <sup>-</sup>                             | 3.25 <sup>c</sup>                       | 92     | Adv. Funct. Mater. 2025, 35, 2415970        |
| 7     | FeCoNiGeSb-HEI                           | 1.0 M KOH + 500 ppm NO <sub>3</sub> <sup>-</sup>                            | 7.5 <sup>c</sup>                        | 97.6   | Angew. Chem. Int. Ed. 2025, 64, e202502333  |
| 8     | HEAOs                                    | 1.0 M KOH + 0.5 M KNO <sub>3</sub>                                          | 0.314 <sup>d</sup>                      | 84     | Small 2026, 22, e07803                      |
| 9     | FeCoNiAlTi                               | 0.2 M K <sub>2</sub> S <sub>2</sub> O <sub>4</sub> + 50 mM KNO <sub>3</sub> | 0.52 <sup>c</sup>                       | 95.23  | Angew. Chem. Int. Ed. 2024, 63, e202407589  |
| 10    | FeNiCoMnRh                               | 0.5 M NaOH + 0.25 M NO <sub>3</sub> <sup>-</sup>                            | 0.0754 <sup>d</sup>                     | 81.5   | Chem. Eur. J. 2025, 31, e202500887          |
| 11    | CuCoNiRuPt                               | 1 M KOH + 1000 ppm KNO <sub>3</sub>                                         | 3.4 <sup>d</sup>                        | 98     | Nano Lett. 2025, 25, 14185                  |
| 12    | PdCuNiCoZn                               | 0.5 M K <sub>2</sub> SO <sub>4</sub> + 0.1 M KNO <sub>3</sub>               | 447 <sup>a</sup>                        | 99.0   | Nat. Commun. 2025, 16, 7915                 |
| 13    | np-CuCoNiPdRuAl                          | 0.1 M KOH + 50 mM NO <sub>3</sub> <sup>-</sup>                              | 30.47 <sup>a</sup>                      | 97.4   | Sci. China Chem. 2026, 69, 1233             |
| 14    | MgCoNiCuZnO                              | 1 M KOH + 0.1 M KNO <sub>3</sub>                                            | 4.48 <sup>a</sup>                       | 93.4   | Nat. Commun. 2024, 15, 260                  |
| 15    | HE-OH                                    | 1 M KOH + 0.1 M KNO <sub>3</sub>                                            | 30.4 <sup>c</sup>                       | ~100   | Chinese Chem. Lett. 2025, 36, 111294        |
| 16    | CuNiCoZnMn                               | 0.5 M Na <sub>2</sub> SO <sub>4</sub> + 0.1 M KNO <sub>3</sub>              | 0.7237 <sup>d</sup>                     | 96.6   | ACS Appl. Mater. Interfaces 2024, 16, 43526 |
| 17    | HESA NCs                                 | 0.5 M Na <sub>2</sub> SO <sub>4</sub> + 100 mM NaNO <sub>3</sub>            | 81.4 <sup>a</sup>                       | 93.4   | Nat. Commun. 2024, 15, 6932                 |
| 18    | FeCoNiCuRu                               | 0.5 M K <sub>2</sub> SO <sub>4</sub> + 0.1 M KNO <sub>3</sub>               | 0.84145 <sup>c</sup>                    | 94.5   | Chem. Eng. J. 2024, 500, 157426             |
| 19    | FeCoNiCuSn<br>HEA/rGO/CP                 | 0.1 M Na <sub>2</sub> SO <sub>4</sub> + 100 ppm NaNO <sub>3</sub>           | 0.8837 <sup>c</sup>                     | 94.5   | Inorg. Chem. Front., 2025, 12, 682          |
| 20    | RuRhFeCoNiCu<br>HEO-NTs                  | 1.0 M KOH + 1.0 M KNO <sub>3</sub>                                          | 72.7 <sup>a</sup> /<br>2.3 <sup>d</sup> | 97.2   | This work                                   |

**Note:** <sup>a</sup> mg h<sup>-1</sup> mg<sub>cat.</sub><sup>-1</sup>; <sup>b</sup> mmol h<sup>-1</sup> mg<sub>cat.</sub><sup>-1</sup>; <sup>c</sup> mg h<sup>-1</sup> cm<sup>-2</sup>; <sup>d</sup> mmol h<sup>-1</sup> cm<sup>-2</sup>
